# Supplementary material for: The Difference in Cytotoxic Activity between Two Optical Isomers of Gelsemine from Gelsemium elegans Benth. on PC12 Cells
Source: MDPI journal article supplement (doi:10.3390/molecules24102004), 2019-05-25
Supplement: s1 [file s1]

# The Difference in Cytotoxic Activity between Two Optical Isomers of Gelsemine from *Gelsemium elegans* Benth. on PC12 Cells

Li Lin<sup>1</sup>, Yan-Chun Liu<sup>1,2</sup>, and Zhao-Ying Liu<sup>1,2,\*</sup>

<sup>1</sup> College of Veterinary Medicine, Hunan Agricultural University, Changsha 410128, Hunan, China

<sup>2</sup> Hunan Engineering Technology Research Center of Veterinary Drugs, Hunan Agricultural University, Changsha 410128, Hunan, China

\* Correspondence: liu\_zhaoying@hunau.edu.cn

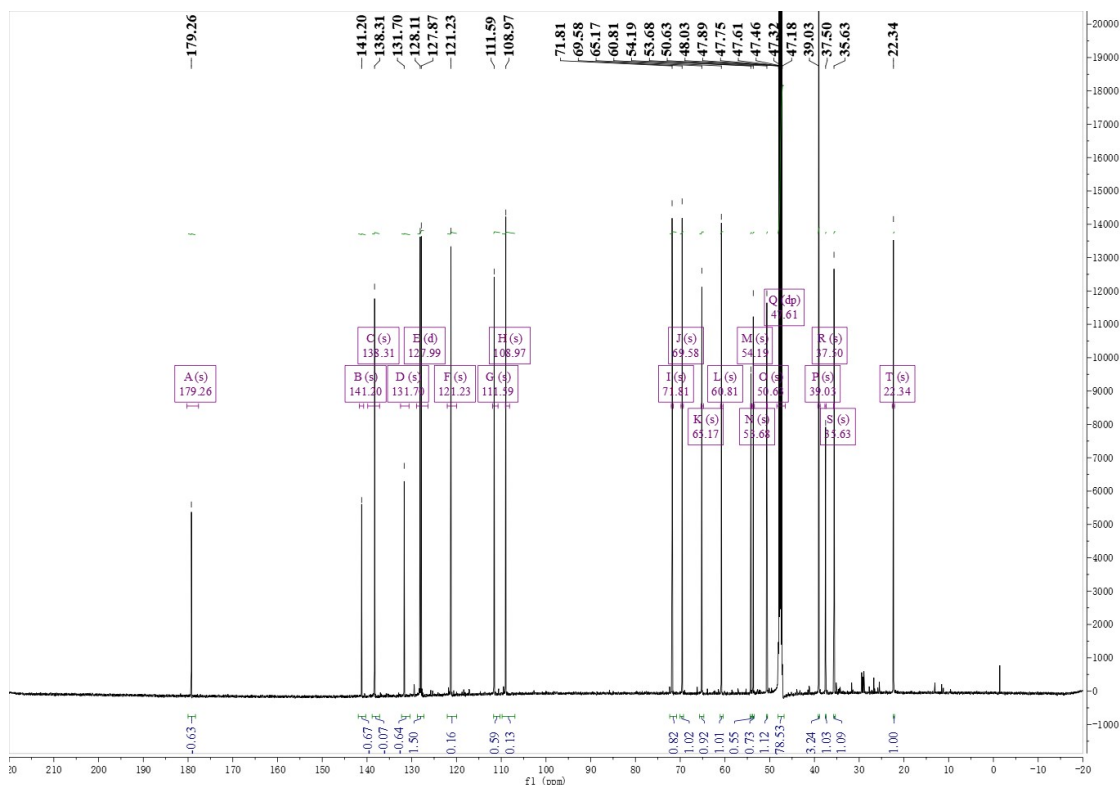

Figure S1. The  $^{13}\text{C}$  NMR spectrum of compound **1**.

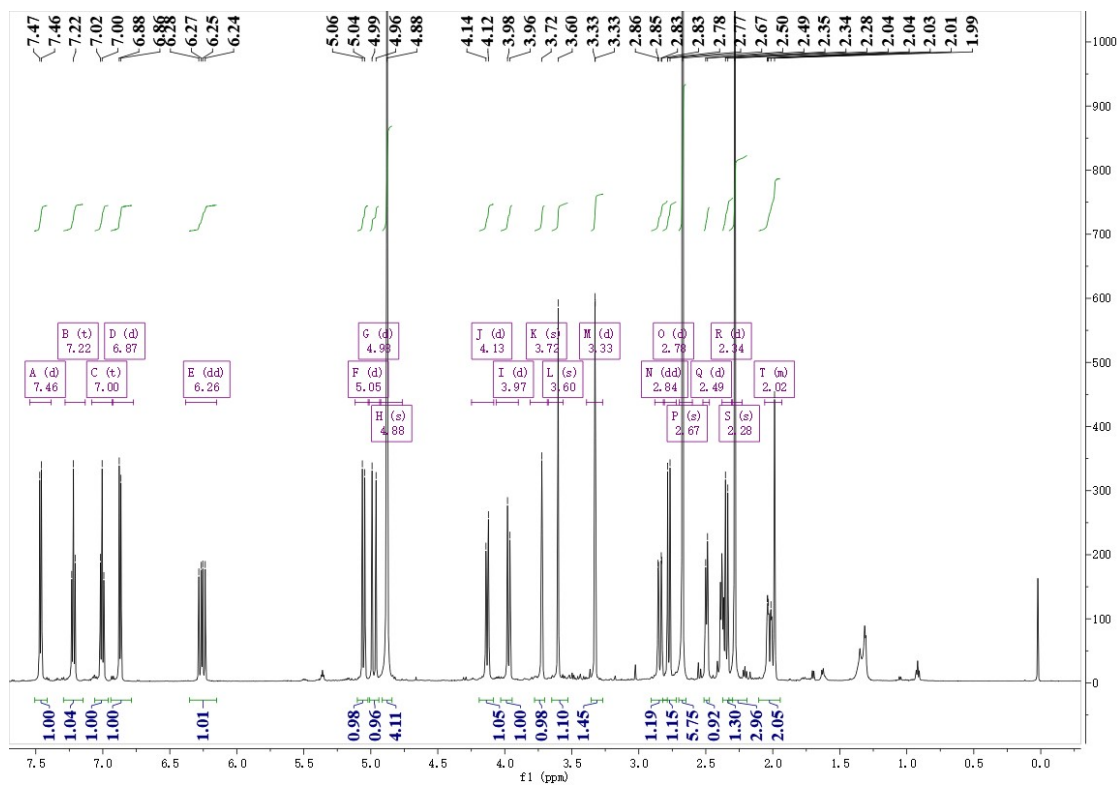

Figure S2. The  $^1\text{H}$  NMR spectrum of compound **1**.

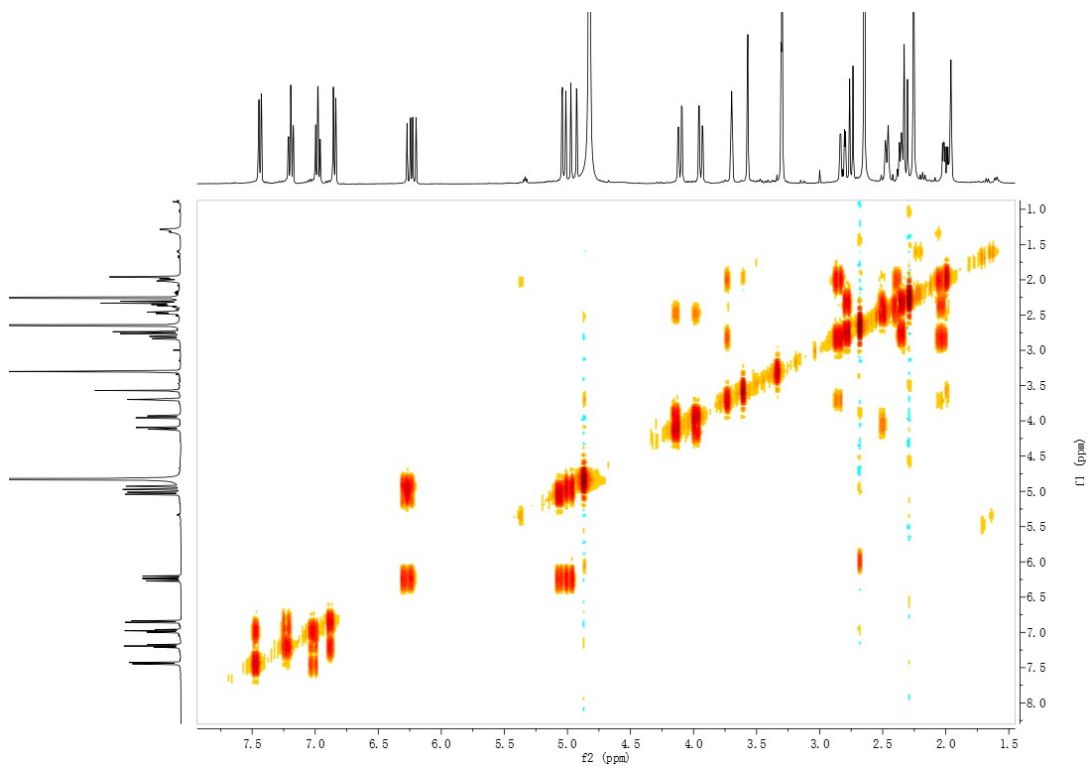

**Figure S3.** The  $^1\text{H}$ - $^1\text{H}$  COSY spectrum of compound **1**.

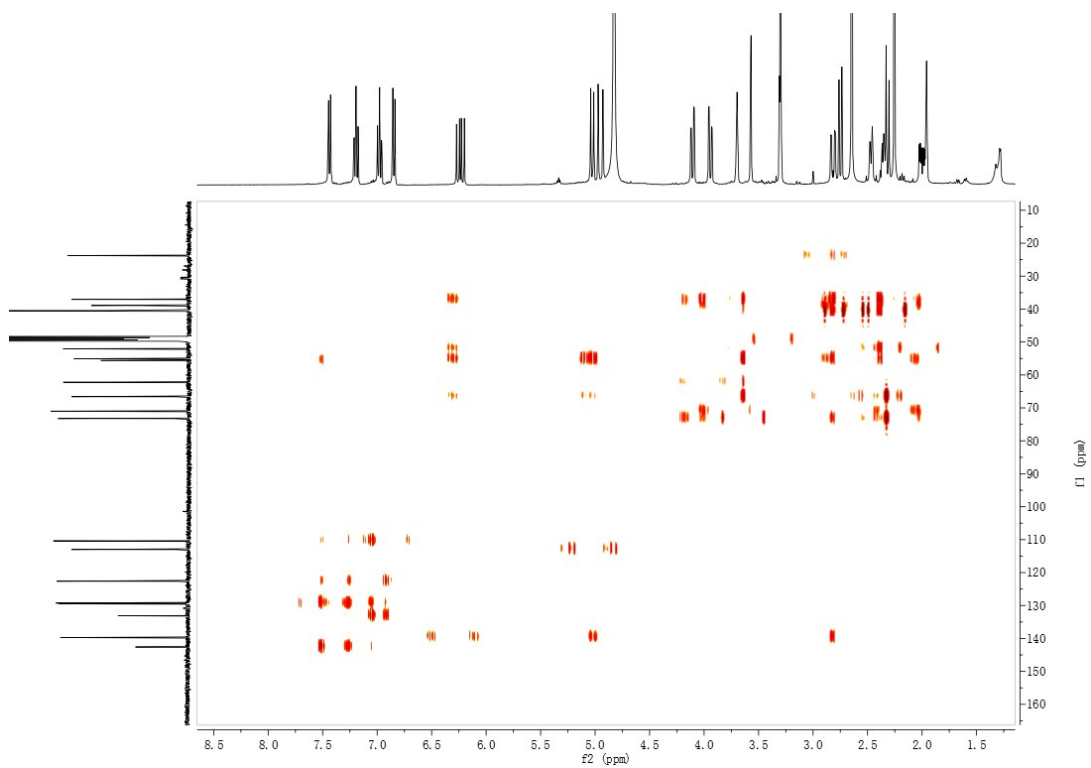

**Figure S4.** The HMBC spectrum of compound **1**.

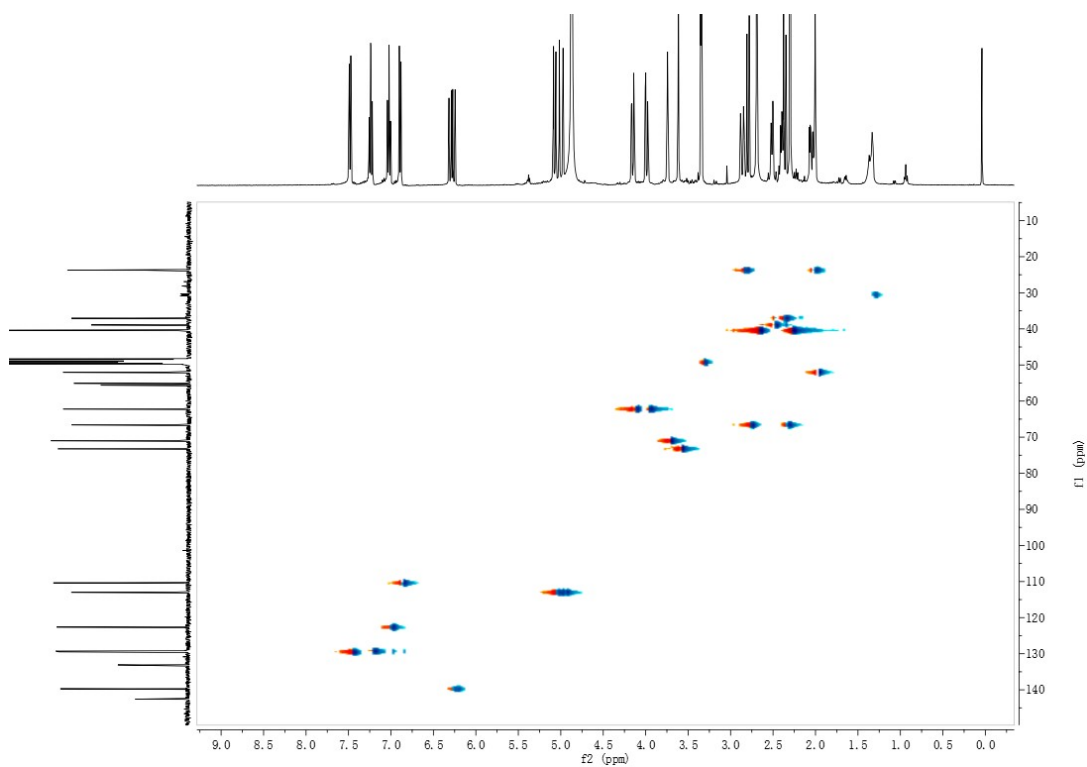

**Figure S5.** The HSQC spectrum of compound **1**.

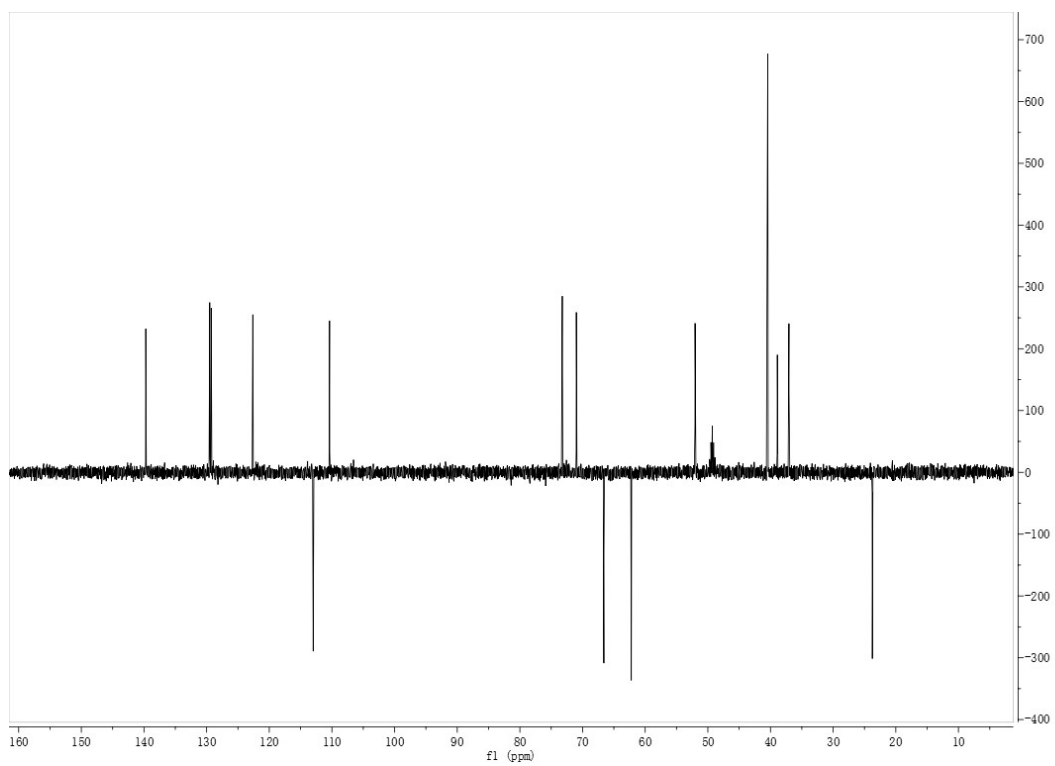

**Figure S6.** The DEPT135 spectrum of compound **1**.

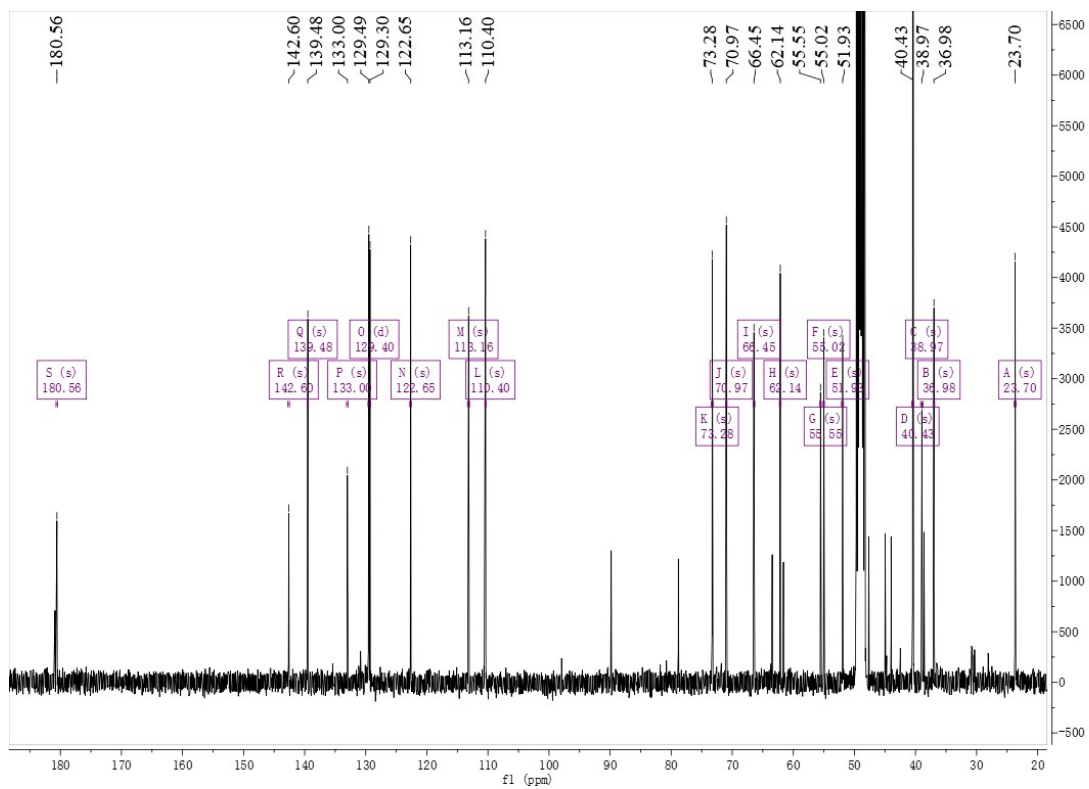

Figure S7. The  $^{13}\text{C}$  NMR spectrum of compound 2.

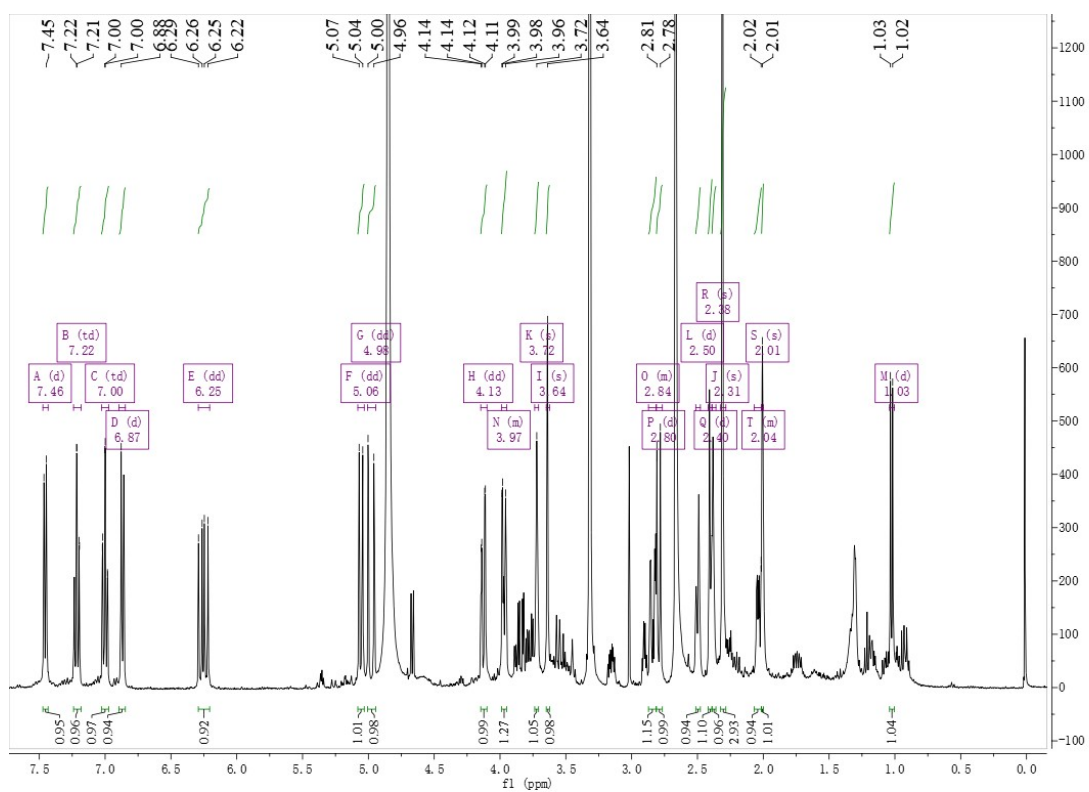

Figure S8. The  $^1\text{H}$  NMR spectrum of compound 2.

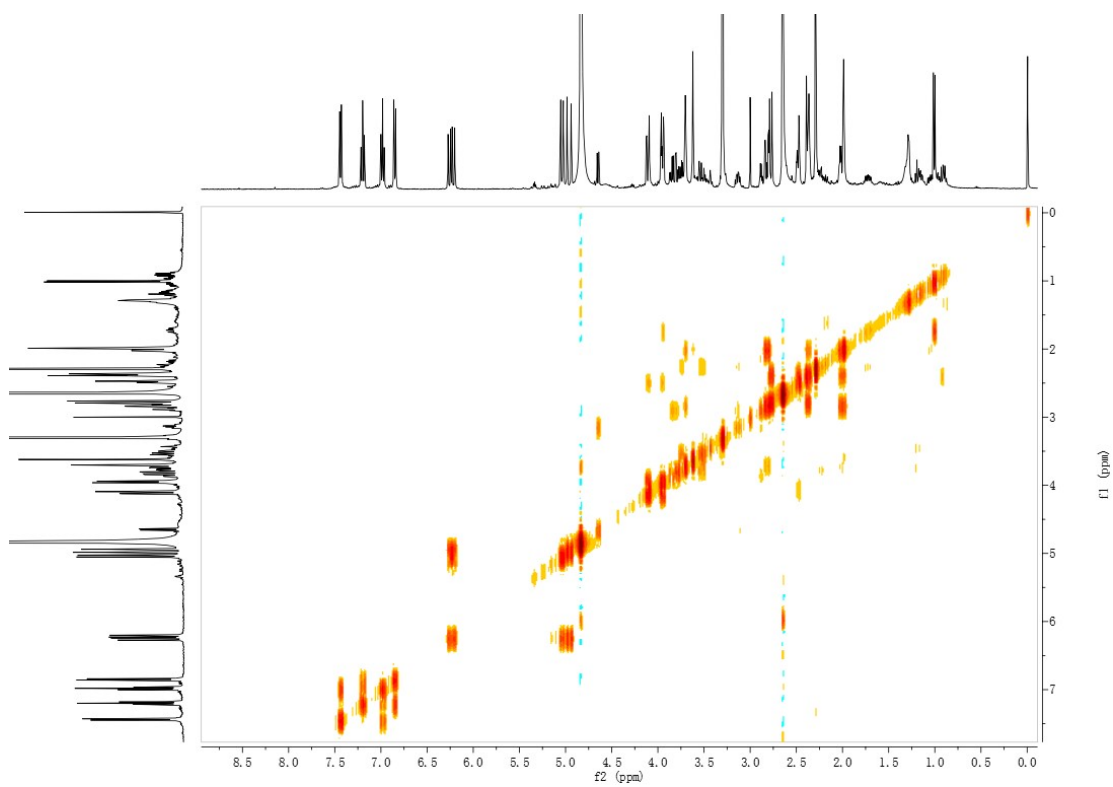

**Figure S9.** The <sup>1</sup>H-<sup>1</sup>H COSY spectrum of compound **2**.

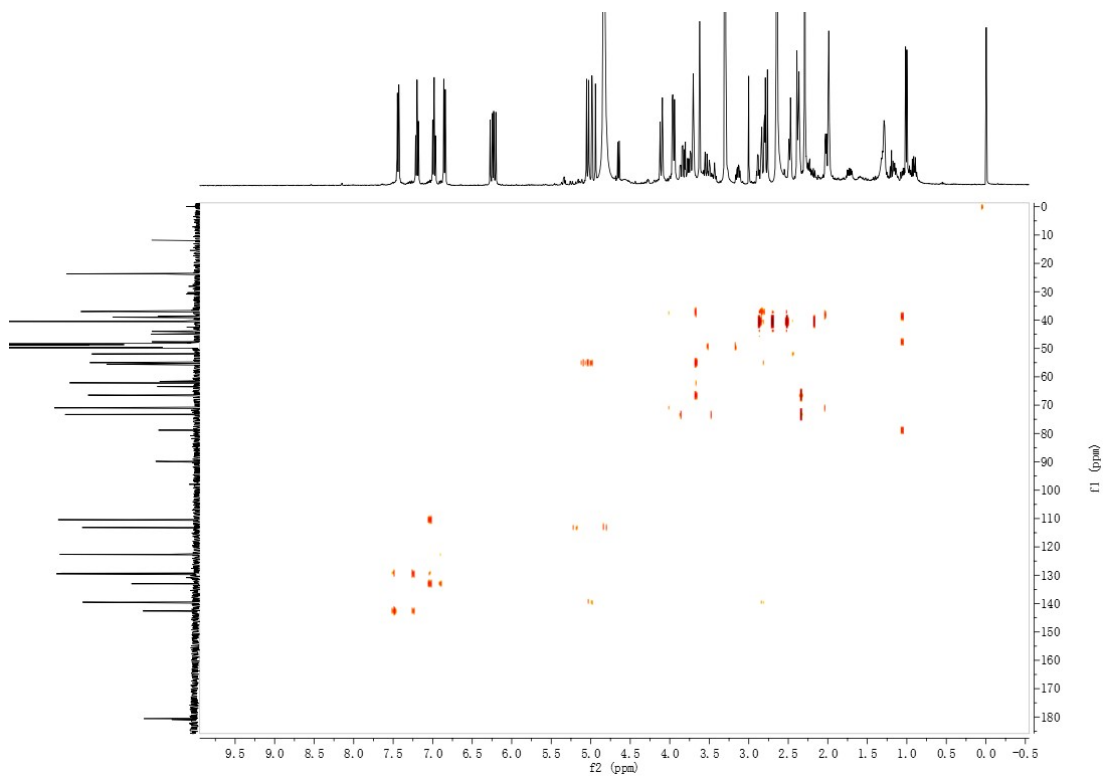

**Figure S10.** The HMBC spectrum of compound **2**.

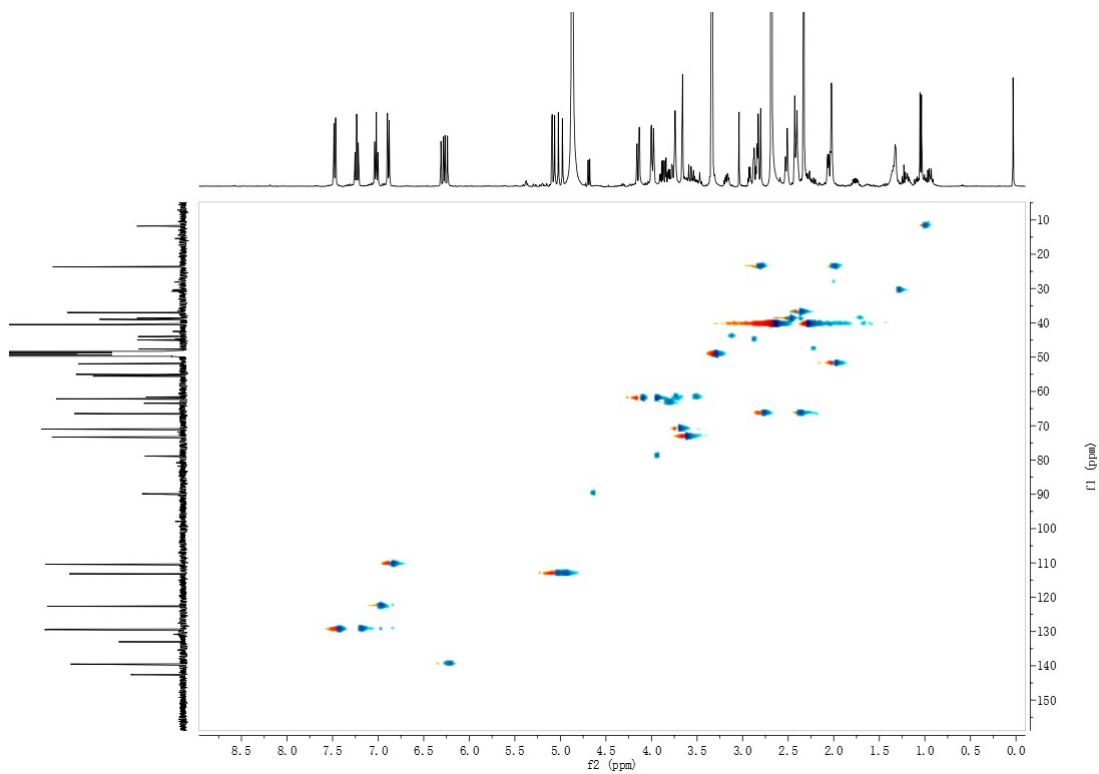

**Figure S11.** The HSQC spectrum of compound **2**.

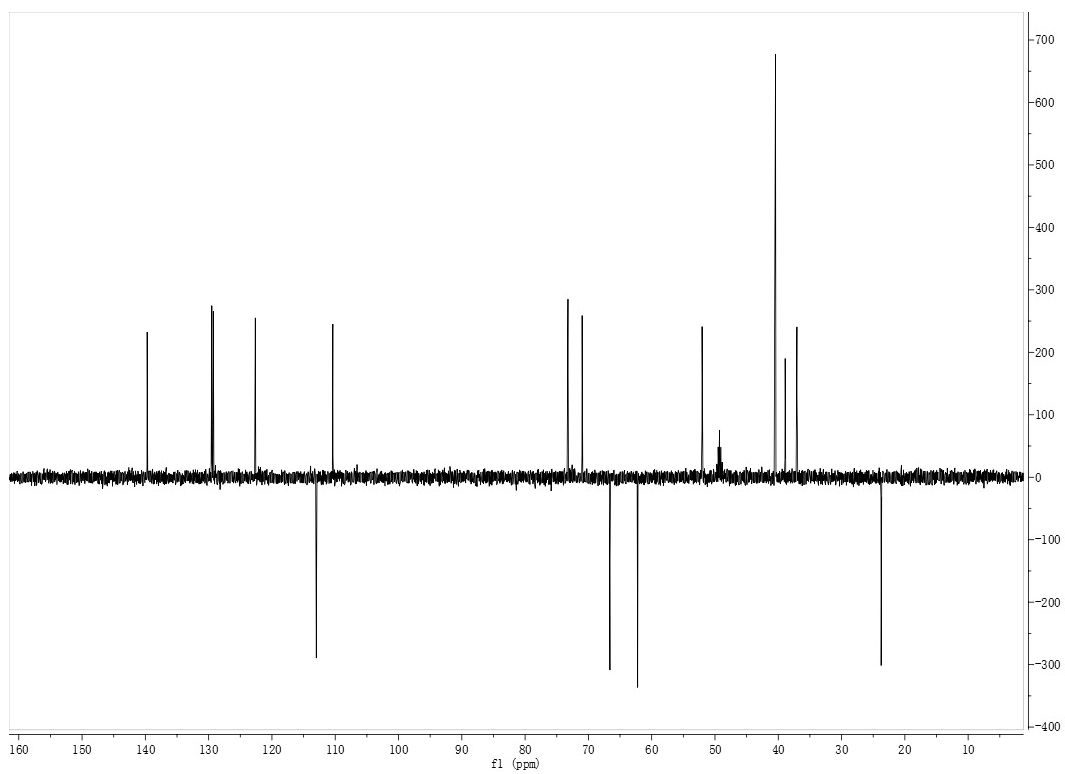

**Figure S12.** The DEPT135 spectrum of compound **2**.

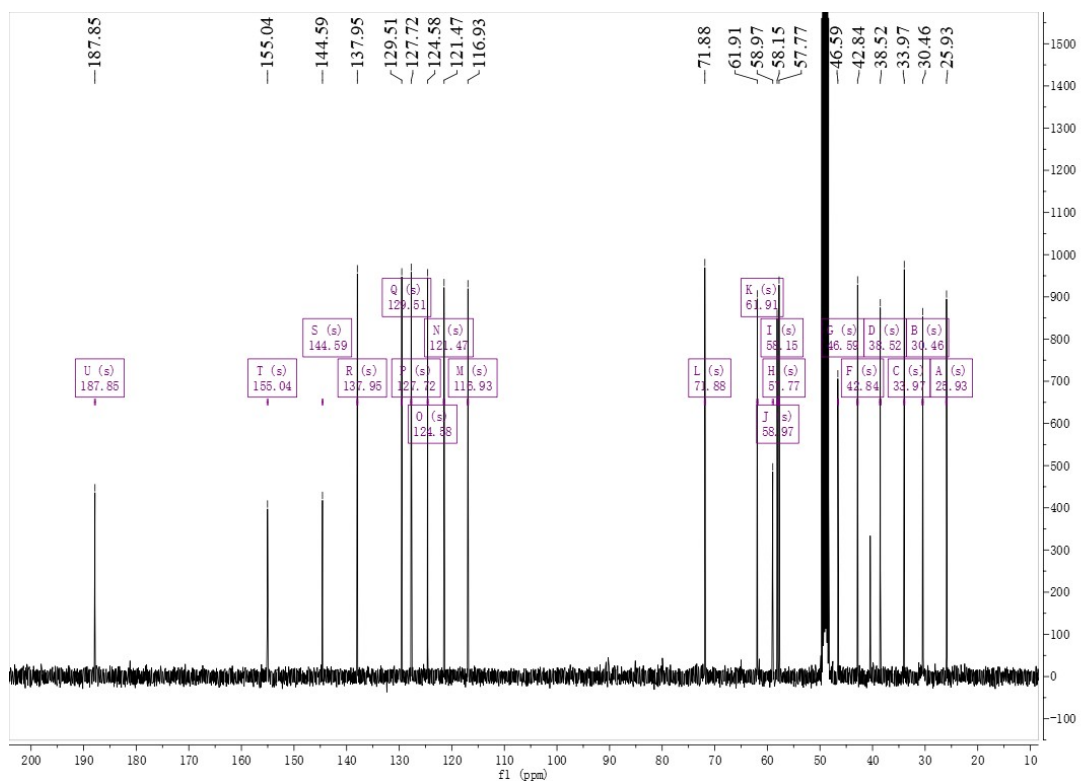

Figure S13. The  $^{13}\text{C}$  NMR spectrum of compound 3.

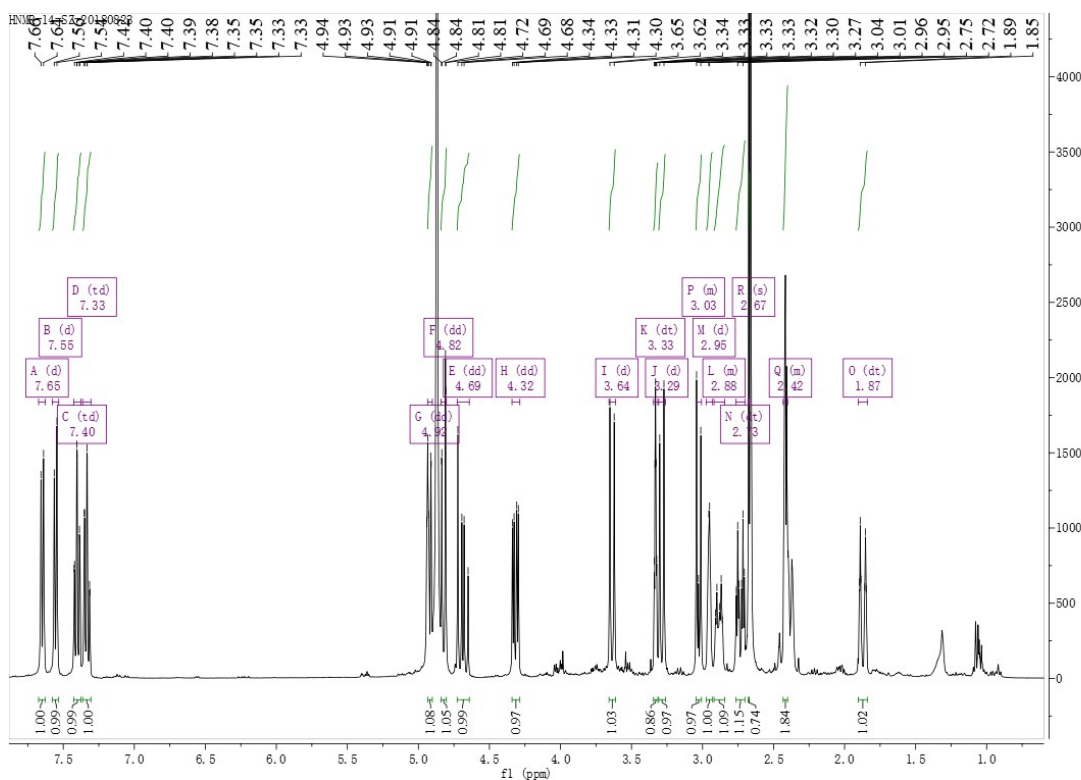

Figure S14. The  $^1\text{H}$  NMR spectrum of compound 3.
